# Supplementary material
Source: publisher site journal article supplement (https://www.dovepress.com/article/590383)
Supplement: Supplementary file 1 [file 590383%20Revised%20Supplementary%20Materials.docx]

Table S1. Cardiometabolic risk factors in the definition of MASLD

| **Metabolic risk factor** | **Adult criteria** |
| --- | --- |
| Overweight or Obesity | Body mass index ≥23 kg/m² or  waist circumferenc ≥90 cm for men and ≥80 cm for women; |
| Dysglycaemia or type 2 diabetes | Hemoglobin A1c ≥39 mmol/mol or  fasting plasma glucose ≥5.6 mmol/L or  a history of type 2 diabetes |
| triglycerides | ≥1.7 mmol/L or  a history of dyslipidemia |
| high-density lipoprotein cholesterol | ≤1.0 mmol/L in men and ≤1.3 mmol/L in women or  a history of dyslipidemia |
| Blood pressure | Blood pressure ≥130/85 mmHg or  a history of hypertension |

Table S2. Formulas for the Calculation of Indices

| **Index** | **Formula** |
| --- | --- |
| TyG | ln [(TG (mg/dL) × FPG (mg/dL)) / 2] |
| TyG-BMI | TyG × BMI (kg/m²) |
| TyG-WC | TyG × WC (cm) |
| WHtR | WC (cm) / height (cm) |
| TyG-WHtR | TyG × WHtR |
| METS-IR | ln [(2 × FPG (mg/dL)) + TG (mg/dL)] × BMI / ln (HDL-C (mg/dL)) |

Table S3. Correlation clusters of continuous predictors and retained variables

| **Cluster ID** | **Variables in cluster** | **Variables excluded** |
| --- | --- | --- |
| 1 | Age | / |
| 2 | Height | / |
| 3 | Weight, HC | HC |
| 4 | Waistline, TyG-BMI, TyG-WC, METS-IR | TyG-BMI, TyG-WC |
| 5 | Systolic, Diastolic | Diastolic |
| 6 | TG | / |
| 7 | FPG | / |
| 8 | HDL.C | / |
| 9 | TyG-WHtR | / |

Table S4. Hyperparameter search ranges for each ML algorithm

| Algorithm | Parameter description | **Values** |
| --- | --- | --- |
| ERT | Mtry (Number of features sampled for splitting at each node) | 2,4,6,8 |
| min.node.size (Minimum number of samples required at a terminal node) | 1,5,10 |
| XGBoost | nrounds (Number of boosting iterations) | 100, 200 |
| max_depth (Maximum depth of each tree) | 3, 5, 7 |
| eta (Learning rate) | 0.001, 0.01, 0.1 |
| gamma (Minimum loss reduction required to make a further partition on a leaf node) | 0.1, 1 |
| min_child_weight (Minimum sum of instance weights required in a child node) | 1, 5 |
| MLP | size (Number of units in the hidden layer) | 5,7,9,11,13 |
| decay (Weight decay parameter for regularization) | 0.001,0.01,0.1 |
| SVM | sigma (Kernel coefficient for radial basis function [RBF] kernel) | 0.001,0.01.0.05 |
| C (Regularization parameter, controlling the trade-off between margin maximization and error minimization) | 0.1,1,10 |
| kNN | k (Number of nearest neighbors considered for classification) | 3, 5, 7, 9 |
| GNB | No hyperparameters tuned | / |
